# Supplementary material for: A 90-Day Subchronic Toxicity Study of Consumption of GH-Transgenic Triploid Carp in Wistar Rats
Source: MDPI journal article supplement (doi:10.3390/fishes7010010), 2022-01-05
Supplement: s1 [file s1]

**Table S1.** Food consumption ( $n = 5/\text{group}$ ; mean  $\pm$  SD, g).

|                | Control<br>Group | Non-GM carp  |              |              | GH-ttc       |              |              |
|----------------|------------------|--------------|--------------|--------------|--------------|--------------|--------------|
|                |                  | 2.5%         | 5%           | 10%          | 2.5%         | 5%           | 10%          |
| <i>Males</i>   |                  |              |              |              |              |              |              |
| Week 1         | 165.9 ± 8.9      | 144.2 ± 61.2 | 165.2 ± 8.2  | 159.7 ± 11.3 | 169.0 ± 7.0  | 168.5 ± 7.7  | 158.5 ± 11.3 |
| Week 2         | 158.0 ± 10.8     | 166.8 ± 5.1  | 162.3 ± 4.0  | 161.0 ± 8.9  | 161.9 ± 7.6  | 163.7 ± 6.6  | 158.2 ± 9.1  |
| Week 3         | 195.2 ± 11.0     | 209.2 ± 7.9  | 199.6 ± 2.9  | 194.0 ± 4.3  | 199.7 ± 8.5  | 196.1 ± 8.7  | 194.2 ± 8.7  |
| Week 4         | 218.2 ± 8.0      | 215.8 ± 19.6 | 202.9 ± 9.3  | 195.2 ± 8.9  | 205.1 ± 7.0  | 200.6 ± 13.0 | 208.4 ± 8.8  |
| Week 5         | 192.5 ± 7.1      | 212.2 ± 14.5 | 204.9 ± 2.1  | 195.3 ± 10.0 | 207.0 ± 11.8 | 200.6 ± 9.1  | 195.0 ± 8.1  |
| Week 6         | 205.0 ± 9.5      | 229.0 ± 16.5 | 214.7 ± 7.3  | 204.6 ± 9.5  | 216.6 ± 12.0 | 206.5 ± 11.7 | 200.5 ± 14.3 |
| Week 7         | 210.3 ± 11.3     | 215.5 ± 23.6 | 218.0 ± 4.6  | 206.0 ± 14.4 | 219.5 ± 9.6  | 202.6 ± 14.1 | 200.1 ± 15.4 |
| Week 8         | 207.6 ± 9.1      | 220.1 ± 11.0 | 216.8 ± 5.5  | 199.0 ± 11.3 | 213.4 ± 11.8 | 202.5 ± 16.2 | 203.2 ± 15.2 |
| Week 9         | 213.9 ± 10.2     | 239.5 ± 29.3 | 220.6 ± 9.1  | 200.1 ± 13.9 | 210.4 ± 16.0 | 212.3 ± 15.7 | 209.6 ± 7.5  |
| Week 10        | 173.8 ± 7.2      | 189.4 ± 16.1 | 183.6 ± 7.1  | 169.3 ± 5.2  | 189.6 ± 11.5 | 174.5 ± 14.5 | 173.1 ± 8.2  |
| Week 11        | 212.8 ± 6.9      | 180.1 ± 14.1 | 216.6 ± 10.0 | 198.0 ± 7.8  | 215.4 ± 11.5 | 202.3 ± 20.7 | 197.5 ± 15.0 |
| Week 12        | 218.7 ± 29.4     | 237.9 ± 10.2 | 209.4 ± 3.9  | 202.4 ± 6.9  | 218.9 ± 15.2 | 205.5 ± 16.5 | 205.9 ± 12.3 |
| Week 13        | 135.7 ± 6.7      | 157.0 ± 20.5 | 137.7 ± 6.9  | 131.4 ± 4.9  | 141.5 ± 9.3  | 137.3 ± 9.6  | 137.4 ± 8.0  |
| <i>Females</i> |                  |              |              |              |              |              |              |
| Week 1         | 149.2 ± 7.5      | 130.7 ± 13.3 | 143.4 ± 6.6  | 149.4 ± 7.6  | 146.5 ± 4.3  | 141.2 ± 4.4  | 137.1 ± 12.6 |
| Week 2         | 133.3 ± 2.5      | 122.4 ± 5.9  | 128.6 ± 6.0  | 131.1 ± 8.8  | 127.7 ± 4.5  | 120.4 ± 5.6  | 126.6 ± 9.6  |
| Week 3         | 148.1 ± 3.9      | 144.7 ± 12.2 | 149.7 ± 10.9 | 149.9 ± 7.8  | 147.7 ± 9.6  | 138.8 ± 8.2  | 144.6 ± 14.4 |
| Week 4         | 157.2 ± 15.7     | 148.3 ± 15.5 | 154.7 ± 7.2  | 157.7 ± 17.2 | 152.3 ± 7.1  | 135.7 ± 11.3 | 152.0 ± 15.9 |
| Week 5         | 150.0 ± 5.0      | 152.3 ± 12.5 | 147.3 ± 7.3  | 147.9 ± 12.9 | 152.0 ± 8.1  | 150.2 ± 15.3 | 146.8 ± 18.3 |
| Week 6         | 152.5 ± 5.6      | 158.6 ± 22.8 | 154.6 ± 14.7 | 152.2 ± 10.6 | 154.6 ± 9.7  | 170.0 ± 32.8 | 153.4 ± 16.8 |
| Week 7         | 153.0 ± 4.1      | 158.8 ± 35.3 | 150.5 ± 9.1  | 149.4 ± 11.2 | 152.8 ± 10.3 | 153.8 ± 7.6  | 155.3 ± 24.1 |
| Week 8         | 151.5 ± 5.6      | 156.5 ± 30.1 | 151.0 ± 13.2 | 157.5 ± 10.3 | 146.7 ± 19.7 | 152.5 ± 5.9  | 147.3 ± 12.5 |
| Week 9         | 163.9 ± 9.8      | 158.5 ± 19.6 | 161.3 ± 8.2  | 168.6 ± 14.9 | 163.6 ± 12.0 | 169.2 ± 22.4 | 160.4 ± 14.0 |
| Week 10        | 122.8 ± 2.7      | 139.2 ± 32.8 | 124.2 ± 9.7  | 122.5 ± 7.7  | 125.4 ± 3.8  | 131.5 ± 11.5 | 127.7 ± 13.0 |
| Week 11        | 150.3 ± 3.8      | 145.8 ± 20.9 | 147.1 ± 8.4  | 133.4 ± 12.2 | 139.9 ± 16.3 | 149.8 ± 10.0 | 155.4 ± 16.2 |
| Week 12        | 163.6 ± 6.4      | 163.3 ± 48.9 | 155.6 ± 13.5 | 170.6 ± 17.0 | 167.4 ± 12.8 | 153.0 ± 14.8 | 156.4 ± 21.2 |
| Week 13        | 106.0 ± 3.1      | 100.1 ± 21.5 | 98.6 ± 6.4   | 101.8 ± 7.2  | 104.4 ± 5.9  | 110.2 ± 20.8 | 97.5 ± 11.1  |
